# Supplementary material for: Fabrication of a three-dimensional graphene coating for solid-phase microextraction of polycyclic aromatic hydrocarbons
Source: Royal Society of Chemistry journal article supplement (doi:10.1039/c5ra05616k), 2015-01-01
Supplement: c5ra05616k1.pdf [file c5ra05616k1.pdf]

# Electronic Supplementary Information

**RA-ART-03-2015-005616**

## **Fabrication of three-dimensional graphene coating for solid-phase microextraction of polycyclic aromatic hydrocarbons**

Shuaihua Zhang, Zhi Li, Xiumin Yang, Chun Wang, Zhi Wang\*

Department of Chemistry, College of Science, Agricultural University of Hebei, Baoding 071001,  
China

\* Corresponding author: Zhi Wang

Phone: +86-312-7521513

Fax: +86-312-7521513

E-mail: zhiwang2013@aliyun.com; [zhiwang2000@hotmail.com](mailto:zhiwang2000@hotmail.com)

**Supplement of Figures**

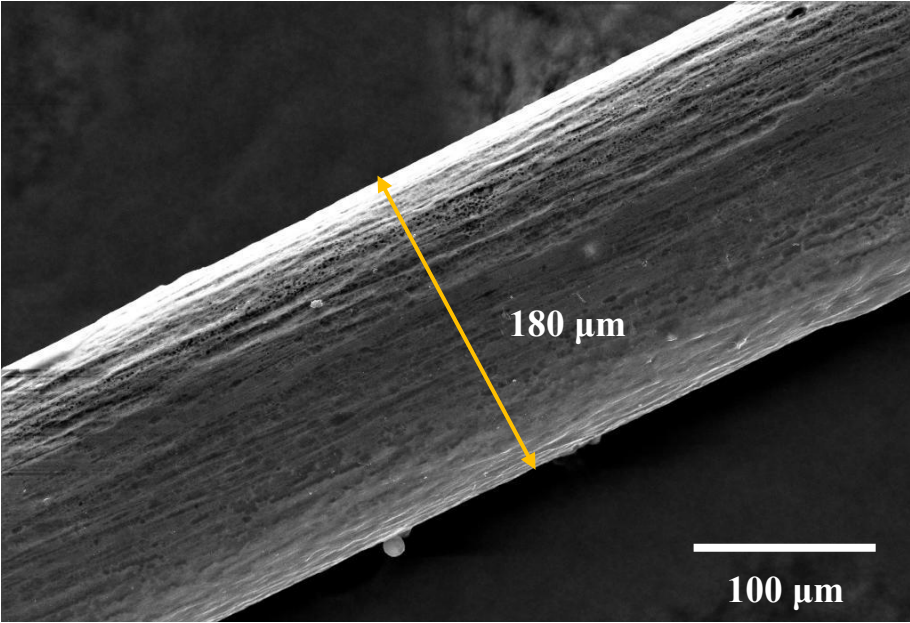

**Fig. S1.** The scanning electron micrograph of stainless steel wire after corrosion process.

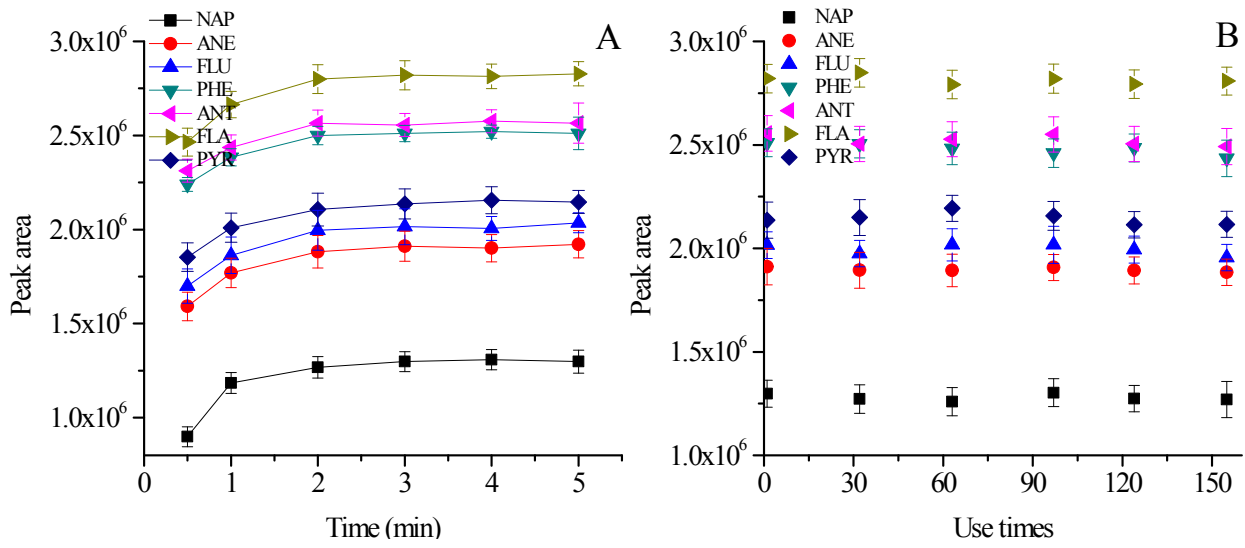

**Fig. S2.** Factors affecting the extraction efficiency for PAHs. (A) Effect of desorption time. (B) Examination of the lifetime of the 3D-G coated fiber.
